# Supplementary material
Source: MDPI journal article supplement (https://www.mdpi.com/2410-3896/8/3/68)
Supplement: s1 [file s1]

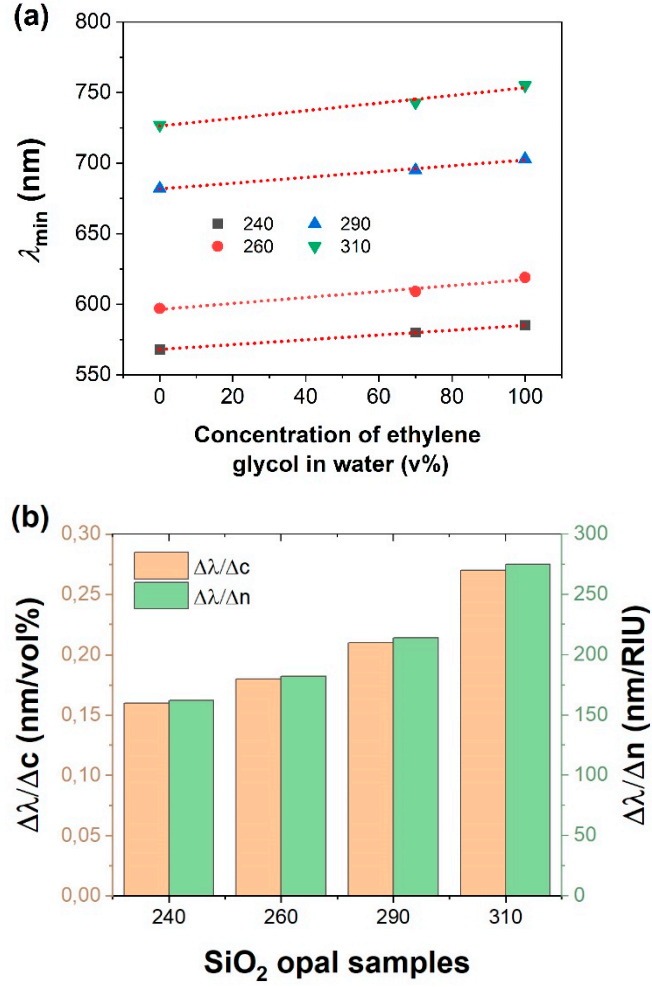

**Figure S1.** (a) Measured wavelength of PSB peaks versus concentration of ethylene glycol – water mixtures in direct SiO<sub>2</sub> films with different sphere sizes; (d) sensitivity of the opal PhC films to ethylene glycol – water solutions per unit in changes of concentration and refractive index unit.

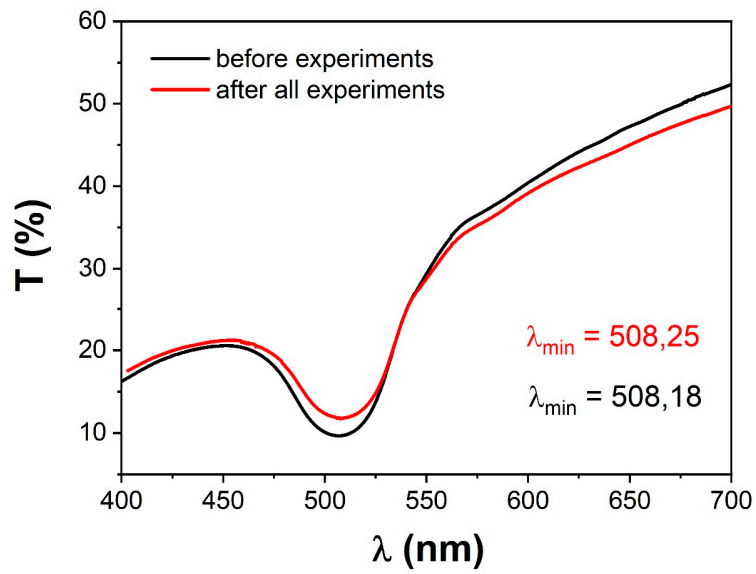

**Figure S2.** Transmittance spectrum of ETPTA inverse PhC (sample S2) before and after all experiments (after 3 months) on impregnation with water-alcohol solutions and drying in air.
